# Supplementary material
Source: HighWire-hosted journal article supplement (https://www.cmajopen.ca/highwire/filestream/88926/field_highwire_adjunct_files/4/open-2022-0118-5-at.pdf)
Supplement: open-2022-0118-5-at.pdf [file open-2022-0118-5-at.pdf]

**Appendix 5**—Measures of association between First Nation status (reference general population) and each of the study outcomes, matched cohort#3 (Benchimol and colleagues case definition)

| Outcomes                            | Stratified analysis            |                            |                          |                             |                               |                                  |
|-------------------------------------|--------------------------------|----------------------------|--------------------------|-----------------------------|-------------------------------|----------------------------------|
|                                     | Full-group analysis<br>(n=708) |                            | Crohn's Disease (n=365)  |                             | Ulcerative Colitis<br>(n=343) |                                  |
|                                     | Unadjusted<br>HR<br>(95%CI)    | Adjusted<br>HR<br>(95%CI)* | Unadjusted<br>HR (95%CI) | Adjusted<br>HR<br>(95%CI)** | Unadjusted<br>HR<br>(95%CI)   | Adjusted<br>HR<br>(95%CI)**<br>* |
| Outpatient gastroenterologist visit | 1.11 (0.90-1.38)               | 1.17 (0.93-1.45)           | 0.85 (0.59-1.24)         | 0.92 (0.63-1.35)            | <b>1.34 (1.02-1.77)</b>       | <b>1.36 (1.03-1.80)</b>          |
| Colonoscopy                         | 1.19 (0.97-1.47)               | 1.11 (0.90-1.38)           | 1.04 (0.72-1.50)         | 1.07 (0.73-1.55)            | 1.13 (0.87-1.47)              | 1.15 (0.88-1.49)                 |
| Prescription claim for IBD          | <b>0.59 (0.47-0.74)</b>        | <b>0.50 (0.40-0.63)</b>    | <b>0.56 (0.38-0.82)</b>  | <b>0.54 (0.36-0.80)</b>     | <b>0.48 (0.36-0.64)</b>       | <b>0.49 (0.37-0.65)</b>          |
| Prescription claim of a Biologic    | 0.68 (0.41-1.13)               | 0.78 (0.47-1.30)           | 0.78 (0.40-1.55)         | 0.78 (0.39-1.56)            | 0.72 (0.34-1.53)              | 0.77 (0.36-1.64)                 |
| Prescription claim of an IM         | 0.73 (0.50-1.06)               | 0.83 (0.56-1.21)           | 0.72 (0.43-1.23)         | 0.70 (0.41-1.20)            | 0.93 (0.54-1.59)              | 0.98 (0.57-1.70)                 |
| Prescription claim of a 5-ASA       | <b>0.69 (0.55-0.87)</b>        | <b>0.54 (0.43-0.69)</b>    | <b>0.64 (0.41-0.98)</b>  | <b>0.61 (0.40-0.95)</b>     | <b>0.51 (0.39-0.68)</b>       | <b>0.51 (0.39-0.68)</b>          |
| IBD-specific hospitalization        | 1.26 (0.95-1.67)               | 1.30 (0.98-1.74)           | <b>1.53 (1.02-2.28)</b>  | 1.37 (0.91-2.08)            | 1.23 (0.83-1.83)              | 1.22 (0.82-1.82)                 |
| IBD-related hospitalization         | <b>1.46 (1.13-1.89)</b>        | <b>1.50 (1.16-1.96)</b>    | <b>1.67 (1.14-2.45)</b>  | <b>1.51 (1.02-2.24)</b>     | <b>1.48 (1.04-2.10)</b>       | <b>1.48 (1.04-2.10)</b>          |
| Surgery for IBD                     | 1.15 (0.81-1.63)               | 1.14 (0.80-1.63)           | 1.16 (0.66-2.02)         | 1.10 (0.63-1.95)            | 1.16 (0.74-1.84)              | 1.17 (0.74-1.86)                 |

HR: hazard ratio, 95%CI: 95% confidence interval. Bold values denote statistically significant results.

\* Models adjusted by rural or urban status, and diagnostic type (n=707).

\*\* Crohn's Disease group, models adjusted by rural or urban status (n=364).

\*\*\* Ulcerative colitis group, models adjusted by rural or urban status.

Appendix 5, as supplied by the authors. Appendix to: Marques Santos JD, Fowler S, Jennings D, et al. Health care utilization differences between First Nations people and the general population with inflammatory bowel disease: a retrospective cohort study from Saskatchewan, Canada. CMAJ Open 2022. doi:10.9778/cmajo.20220118. Copyright © 2022 The Author(s) or their employer(s). To receive this resource in an accessible format, please contact us at cmajgroup@cmaj.ca.
